# Supplementary material for: The joint effect of insomnia symptoms and lifestyle factors on risk of self-reported fibromyalgia in women: longitudinal data from the HUNT Study
Source: PubMed Central journal article supplement — BMJ Open. 2019 Aug 22;9(8):e028684. doi: 10.1136/bmjopen-2018-028684 (PMC6707686; doi:10.1136/bmjopen-2018-028684), 2019-08-22
Supplement: bmjopen-2018-028684.draft_revisions.pdf [file bmjopen-2018-028684.draft_revisions.pdf]

# BMJ Open

BMJ Open is committed to open peer review. As part of this commitment we make the peer review history of every article we publish publicly available.

When an article is published we post the peer reviewers' comments and the authors' responses online. We also post the versions of the paper that were used during peer review. These are the versions that the peer review comments apply to.

The versions of the paper that follow are the versions that were submitted during the peer review process. They are not the versions of record or the final published versions. They should not be cited or distributed as the published version of this manuscript.

BMJ Open is an open access journal and the full, final, typeset and author-corrected version of record of the manuscript is available on our site with no access controls, subscription charges or pay-per-view fees (<http://bmjopen.bmj.com>).

If you have any questions on BMJ Open's open peer review process please email [info.bmjopen@bmj.com](mailto:info.bmjopen@bmj.com)

# BMJ Open

## The joint effect of insomnia symptoms and lifestyle factors on risk of self-reported fibromyalgia in women: Longitudinal data from the HUNT study

|                               |                                                                                                                                                                                                                                                                                                                                                                                                                                                                                                                                                                                                                                                                                                                                                                                                                                                                                                                                                                 |
|-------------------------------|-----------------------------------------------------------------------------------------------------------------------------------------------------------------------------------------------------------------------------------------------------------------------------------------------------------------------------------------------------------------------------------------------------------------------------------------------------------------------------------------------------------------------------------------------------------------------------------------------------------------------------------------------------------------------------------------------------------------------------------------------------------------------------------------------------------------------------------------------------------------------------------------------------------------------------------------------------------------|
| Journal:                      | <i>BMJ Open</i>                                                                                                                                                                                                                                                                                                                                                                                                                                                                                                                                                                                                                                                                                                                                                                                                                                                                                                                                                 |
| Manuscript ID                 | bmjopen-2018-028684                                                                                                                                                                                                                                                                                                                                                                                                                                                                                                                                                                                                                                                                                                                                                                                                                                                                                                                                             |
| Article Type:                 | Research                                                                                                                                                                                                                                                                                                                                                                                                                                                                                                                                                                                                                                                                                                                                                                                                                                                                                                                                                        |
| Date Submitted by the Author: | 25-Dec-2018                                                                                                                                                                                                                                                                                                                                                                                                                                                                                                                                                                                                                                                                                                                                                                                                                                                                                                                                                     |
| Complete List of Authors:     | Skarpsno, Eivind; Norges Teknisk Naturvitenskapelige Universitet Institutt for Samfunnsmedisin, Department of Public Health and Nursing; Department of Neurology and Clinical Neurophysiology, St. Olavs Hospital, Trondheim, Norway<br>Nilsen, Tom; Norwegian University of Science and Technology, Department of Public Health and Nursing<br>Sand, Trond; St. Olav Hospital, Department of Neurology and Clinical Neurophysiology, St. Olavs Hospital, Trondheim, Norway; Norwegian University of Science and Technology, Department of Neuromedicine and Movement Science, Norwegian University of Science and Technology (NTNU), Trondheim, Norway<br>Hagen, Knut; St. Olav Hospital, Department of Neurology and Clinical Neurophysiology; Norwegian University of Science and Technology , Department of Neuromedicine and Movement Science<br>Mork, Paul Jarle; Norwegian University of Science and Technology, Department of Public Health and Nursing |
| Keywords:                     | Insomnia, PUBLIC HEALTH, Fibromyalgia, Physical activity, Body mass index, Exercise                                                                                                                                                                                                                                                                                                                                                                                                                                                                                                                                                                                                                                                                                                                                                                                                                                                                             |
|                               |                                                                                                                                                                                                                                                                                                                                                                                                                                                                                                                                                                                                                                                                                                                                                                                                                                                                                                                                                                 |

SCHOLARONE™  
Manuscripts

1  
2  
3 **The joint effect of insomnia symptoms and lifestyle factors on risk of self-reported**  
4  
5 **fibromyalgia in women: Longitudinal data from the HUNT study**  
6

7 Eivind Schjelderup Skarpsno<sup>1,2</sup>, Tom Ivar Lund Nilsen<sup>1,3</sup>, Trond Sand<sup>2,4</sup>, Knut Hagen<sup>2,4,5</sup>,  
8  
9 Paul Jarle Mork<sup>1</sup>  
10  
11

12  
13 <sup>1</sup>Department of Public Health and Nursing, Norwegian University of Science and Technology  
14 (NTNU), Trondheim, Norway, <sup>2</sup>Department of Neurology and Clinical Neurophysiology, St.  
15 Olavs Hospital, Trondheim, Norway, <sup>3</sup>Clinic of Anaesthesia and Intensive Care, St Olavs  
16 Hospital, Trondheim University Hospital, Trondheim, Norway, <sup>4</sup>Department of  
17 Neuromedicine and Movement Science, Norwegian University of Science and Technology  
18 (NTNU), Trondheim, Norway, <sup>5</sup>Norwegian National Headache Centre, St. Olavs Hospital,  
19 Trondheim, Norway  
20  
21  
22  
23  
24  
25  
26  
27  
28  
29  
30  
31

32 **Corresponding author:**

33 Eivind Schjelderup Skarpsno

34 Department of Public Health and Nursing, Norwegian University of Science and Technology  
35 (NTNU), 7491 Trondheim, Norway.

36 E-mail: [eivind.s.skarpsno@ntnu.no](mailto:eivind.s.skarpsno@ntnu.no)

37 ORCID ID: <https://orcid.org/0000-0002-4135-0408>

38 Telephone: +4797521297  
39  
40  
41  
42  
43  
44  
45  
46  
47  
48  
49

50 Word count: 2975

51 Number of tables: 4  
52  
53  
54  
55  
56

57 The authors declare no conflicts of interest.  
58  
59  
60

## ABSTRACT

**Objectives:** To investigate the association between insomnia symptoms and risk of self-reported fibromyalgia in women, and to estimate if leisure time physical activity and body mass index (BMI) modify this association.

**Design:** Prospective cohort study.

**Setting:** We used longitudinal data from the Norwegian HUNT Study collected in HUNT2 (1995-1997) and HUNT3 (2006-2008).

**Participants:** A total of 14,172 women who reported to be free from fibromyalgia at baseline in 1995-1997.

**Primary and secondary outcome measures:** We estimated adjusted risk ratios (RRs) for self-reported fibromyalgia at follow-up in 2006-2008 with 95% confidence interval (CI).

Insomnia symptoms, leisure time physical activity and BMI served as exposures at baseline.

**Results:** Compared to women without insomnia symptoms, women who reported one, two or three symptoms had RRs of fibromyalgia of 1.39 (95% CI 1.08-1.80), 1.86 (95% CI 1.33-2.59) and 2.66 (95% CI 1.75-4.06), respectively. Compared to highly physically active women without insomnia symptoms, women with one or more insomnia symptoms had a RR of fibromyalgia of 1.90 (95% CI 1.30-2.79) if they reported low physical activity and a RR of 1.55 (95% CI 1.12-2.13) if they reported high physical activity. We found no synergistic effect between insomnia symptoms and BMI on risk of fibromyalgia; however, overweight and obese women with one or more insomnia symptoms had RRs of 2.35 (95% CI 1.73-3.21) and 2.18 (95% CI 1.42-3.35) compared to normal weight women without insomnia symptoms.

**Conclusions:** Insomnia symptoms are strongly and positively associated with risk of fibromyalgia in adult women. Leisure time physical activity may compensate for some of the adverse effect of insomnia symptoms on risk of fibromyalgia.

1  
2  
3 **Key word** Insomnia, fibromyalgia, physical activity, body mass index, exercise, overweight  
4  
5  
6  
7

8 **Strengths and limitations of this study**  
9

- 10 - The strengths of the current study include the prospective design, the large study  
11 sample of women, and the ability to adjust for several potential confounding factors.  
12  
13 - A limitation is that fibromyalgia was assessed by self-reports at both HUNT2 and  
14 HUNT3.  
15  
16 - Another limitation is that the questions on sleep in HUNT2 only refer to symptoms the  
17 last month and the question on impaired daytime function is only related to work  
18 ability. The questions do not capture whether the insomnia symptoms occur despite  
19 adequate opportunity and conditions for sleep or if they are explained by another sleep  
20 disorder.  
21  
22 - Furthermore, insomnia symptoms, leisure time physical activity and BMI were  
23 collected only at the baseline survey, and we have no data on changes to these  
24 variables during the follow-up period.  
25  
26  
27  
28  
29  
30  
31  
32  
33  
34  
35  
36  
37  
38  
39  
40  
41  
42  
43  
44  
45  
46  
47  
48  
49  
50  
51  
52  
53  
54  
55  
56  
57  
58  
59  
60

## INTRODUCTION

Fibromyalgia is a musculoskeletal pain syndrome with chronic widespread pain as the main symptom [1, 2]. The etiology and pathophysiology remain undetermined, but a disturbance in the central regulation of pain seems to be an important contributor to the development of fibromyalgia [3]. Depending on the diagnostic criteria used, the prevalence of fibromyalgia is between 2% and 7% in the general adult population but up to fourfold higher among women than men [4].

Almost all women with fibromyalgia report some sleep problems [5], and several studies applying polysomnographic recordings have documented signs of disordered sleep in fibromyalgia [6]. This is not surprising considering that chronic widespread pain has been identified as a strong and independent risk factor for insomnia [7]. Conversely, epidemiological studies indicate that insomnia symptoms increase the risk of fibromyalgia and widespread pain among an otherwise healthy population [8-10]. For instance, in a longitudinal study based on data from the first (1984-86) and second (1995-97) wave of the Norwegian HUNT study, we showed that sleep problems were strongly and positively associated with risk of fibromyalgia [8]. However, this study had several methodological limitations, e.g., sleep problems were assessed by a single question and baseline information about fibromyalgia was not available. More recently, two longitudinal studies have shown that insomnia symptoms are associated with increased risk of fibromyalgia and widespread pain in a working population [9] and among elderly [10]. Although these latter studies indicate an independent association between insomnia symptoms and risk of fibromyalgia, it is not clear if number of insomnia symptoms is dose-dependently associated with risk of fibromyalgia and if lifestyle factors can modify this association.

Some evidence indicates that leisure time physical activity and maintenance of normal body weight to some extent can reduce the adverse effect of sleep problems on risk of chronic

1  
2  
3 pain in the low back and neck/shoulders [11]. Furthermore, excessive body weight may  
4  
5 represent an independent risk factor of fibromyalgia [12], whereas regular physical activity  
6  
7 seems to reduce risk of fibromyalgia [12]. Thus, it is conceivable that leisure time physical  
8  
9 activity and obesity influence the association between insomnia symptoms and risk of  
10  
11 fibromyalgia. Improved knowledge about the interplay between insomnia symptoms and  
12  
13 lifestyle factors would be valuable for improved prevention of fibromyalgia.  
14  
15

16  
17 The aim of the current study was to investigate the prospective association between  
18  
19 insomnia symptoms and risk of self-reported fibromyalgia in women, and to explore if leisure  
20  
21 time physical activity and body mass index (BMI) modify this association.  
22  
23  
24  
25  
26  
27  
28  
29  
30  
31  
32  
33  
34  
35  
36  
37  
38  
39  
40  
41  
42  
43  
44  
45  
46  
47  
48  
49  
50  
51  
52  
53  
54  
55  
56  
57  
58  
59  
60

## MATERIALS AND METHODS

### Study population

This prospective population-based study utilizes longitudinal data on women participating in the HUNT Study. All inhabitants in the Nord-Trøndelag County in Norway aged 20 years or older were invited to participate in three consecutive surveys; first in 1984-1986 (HUNT1), then in 1995-1997 (HUNT2) and last in 2006-2008 (HUNT3). Information on lifestyle and health-related factors were collected by questionnaires and a clinical examination at all three surveys. More detailed information about the HUNT Study can be found at <http://www.ntnu.edu/hunt>.

In the current study, we used data from 20,415 women who participated in both HUNT2 and HUNT3. Of these, we excluded 1,159 women who reported fibromyalgia at baseline at HUNT2. Further, we excluded women with incomplete baseline information on fibromyalgia (n=1,472), insomnia symptoms (n=3,017) and leisure time physical activity (n=595). Thus, the prospective analyses were based on 14,172 women who answered the question about fibromyalgia at follow-up in HUNT3.

All participants signed a written consent, and the study was approved by the Regional Committee for Ethics in Medical Research (project no. 2014/612 REK midt). The study was carried out according to the Declaration of Helsinki.

### Fibromyalgia

At the HUNT2 baseline survey, women reported physician diagnosed fibromyalgia according to the following question: "Has a doctor ever said that you have fibromyalgia (fibrositis/chronic pain syndrome)?", with response options "Yes" or "No". At the HUNT3 follow-up survey, incident fibromyalgia was identified by the question "Have you had, or do you have fibromyalgia?", with response options "Yes" or "No".



### **Insomnia symptoms**

In HUNT2, classification of insomnia symptoms was based on the following three questions:

1) “During the last month, have you had problems falling asleep?”, 2) “During the last month, did you ever wake up too early, not being able to fall asleep again?” and 3) “During the last year, have you been troubled by insomnia to such a degree that it influenced your work ability?”. Question 1 and 2 had the response options: “Never”, “Occasionally”, “Often”, and “Almost every night”, whereas question 3 had the response options “No” and “Yes”.

Participants were classified to have insomnia symptoms if they answered, “Often” or “Almost every night” on at least one of the questions 1-2 or “Yes” on question 3.

### **Body mass index**

Standardized measurements of body height (to the nearest centimeter) and weight (to the nearest half kilogram) obtained at the clinical examination at HUNT2 was used to calculate BMI ( $\text{kg}/\text{m}^2$ ). Participants were then classified according to cut-offs suggested by the World Health Organization [13]: normal weight (BMI 18.5-24.9  $\text{kg}/\text{m}^2$ ), overweight (BMI 25.0-29.9  $\text{kg}/\text{m}^2$ ), or obese (BMI  $\geq 30.0$   $\text{kg}/\text{m}^2$ ). Women defined as underweight (BMI  $< 18.5$   $\text{kg}/\text{m}^2$ ) were excluded from the analyses to reduce the possibility of reverse causation due to undetected disease.

### **Leisure time physical activity**

In HUNT2, leisure time physical activity was assessed by the question: “How much of your leisure time have you been physically active during the last year? (Think of a weekly average for the year. Your commute to work counts as leisure time)”. The participants were then asked to specify number of hours per week of light (no sweating or heavy breathing) and/or hard (sweating and heavy breathing) physical activity with the response options: “None”, “ $< 1$

hour”, “1-2 hours” and “ $\geq 3$  hours” for both light and hard activity. Based on this information, we constructed a new variable with three categories combining information on light and hard activity: low activity ( $< 1$  h light and no hard activity), moderate activity ( $\geq 1$  h light and no hard activity) and high activity (any hard activity).

### Other variables

Education was assessed by the question: “What is your highest level of education?”, and divided in four categories: “Primary school”, “High school”, “College  $\leq 4$  years” and “College  $> 4$  years”. The Hospital Anxiety and Depression Scale (HADS) was used to assess symptoms of anxiety and depression. HADS is a validated and well-established self-rating questionnaire including seven questions on anxiety and seven questions on depression [14]. As recommended, the cut-off score was set to  $\geq 8$  on both anxiety and depression and were dichotomized as presence or no presence of anxiety and/or depression [14, 15]. Smoking was assessed by questions about past and present smoking and then divided into three categories: “Never smoked”, “Former smoker” and “Current smoker”. Chronic musculoskeletal pain was assessed by the question: “During the last year, have you had pain and/or stiffness in your muscles and limbs that has lasted for at least 3 consecutive months?”. Response options were “Yes” and “No”. If answering “Yes”, the participants were asked to indicate the affected body area(s): neck, shoulders, elbows, wrists/hands, upper back, low back, hips, knees, ankles/feet (i.e., a maximum of nine chronic pain sites). We then constructed a new variable using number of chronic musculoskeletal pain sites to categorize participants into four strata: No chronic pain, 1-2 chronic pain sites, 3-4 chronic pain sites, and  $\geq 5$  chronic pain sites.

### Statistical analysis

A modified Poisson regression was used to estimate risk ratios (RRs) of fibromyalgia

1  
2  
3 associated with insomnia symptoms and number of insomnia symptoms. The precision of the  
4  
5 RRs was assessed by 95% confidence intervals (CIs) using robust variance estimation.  
6

7  
8 Women with insomnia symptoms were compared with the reference group of women with no  
9  
10 insomnia symptoms. All associations were adjusted for potential confounding by age (20-29,  
11  
12 30-39, 40-49, 50-59 years), BMI (18.5-24.9 kg/m<sup>2</sup>, 25.0-29.9 kg/m<sup>2</sup>, ≥30 kg/m<sup>2</sup>), leisure time  
13  
14 physical activity (high activity, moderate activity, low activity), education (primary school,  
15  
16 high school, college ≤4 years, college >4 years, unknown), HADS (no anxiety or depression,  
17  
18 anxiety and/or depression, unknown), and smoking (never, former smoker, current smoker,  
19  
20 unknown).  
21  
22

23  
24 We estimated the joint effect of insomnia symptoms and leisure time physical activity  
25  
26 on risk of fibromyalgia, using highly physically active women without insomnia symptoms as  
27  
28 the reference group. Further, in the analysis of the joint effect of insomnia symptoms and  
29  
30 BMI on risk of fibromyalgia, normal weight women without insomnia symptoms formed the  
31  
32 reference group. These analyses were adjusted for all the potential confounders described  
33  
34 above (excluding the variable under study). Potential effect modification between the  
35  
36 variables was assessed as departure from additive effects calculating the relative excess risk  
37  
38 due to interaction (RERI). We calculated RERI estimates with 95% CIs by the following  
39  
40 equation:  $RERI = RR_{\text{low activity and insomnia symptoms}} - RR_{\text{high activity and insomnia symptoms}} - RR_{\text{low activity and}}$   
41  
42  $\text{no insomnia symptoms} + 1$  [16], i.e., RERI >0 indicates a synergistic effect beyond an additive effect.  
43  
44  
45  
46 The same RERI calculation was performed for the joint effect of BMI and insomnia  
47  
48 symptoms.  
49  
50

51  
52 Supplementary analyses were conducted to assess the robustness of the results. First,  
53  
54 we included use of hypnotics and/or sedatives as a covariate in the multiadjusted models.  
55  
56 Likewise, we included number of chronic pain sites (no pain, 1-2 chronic pain sites, 3-4  
57  
58 chronic pain sites, ≥5 chronic pain sites) as a covariate in the multiadjusted models. Finally, in  
59  
60

1  
2  
3 the analyses of joint effect, we excluded women with <1 h physical activity per week from the  
4  
5 group of low physical activity.  
6

7 All statistical analyses were performed using Stata for Windows, version 13.1  
8  
9  
10 (StataCorp LP, College Station, Texas).  
11  
12  
13

#### 14 **Patient and public involvement**

15  
16  
17 No patients were involved in the development and design of this prospective study.  
18  
19  
20  
21  
22  
23  
24  
25  
26  
27  
28  
29  
30  
31  
32  
33  
34  
35  
36  
37  
38  
39  
40  
41  
42  
43  
44  
45  
46  
47  
48  
49  
50  
51  
52  
53  
54  
55  
56  
57  
58  
59  
60

## RESULTS

Table 1 presents the baseline characteristics of the participants stratified by the presence of insomnia symptoms. The proportion of women who reported one or more insomnia symptoms at baseline (HUNT2) was 20% (2,397). At follow-up (HUNT3), 3.3% (466) women reported fibromyalgia.

**Table 1.** Baseline characteristics of the study population stratified by insomnia symptoms.

|                                                          | Insomnia symptoms <sup>a</sup> |                 |
|----------------------------------------------------------|--------------------------------|-----------------|
|                                                          | No                             | Yes             |
| Participants, no.                                        | 11,775                         | 2,397           |
| Age, mean $\pm$ SD, years                                | 43.5 $\pm$ 12.0                | 47.0 $\pm$ 11.8 |
| Body mass index, mean $\pm$ SD, kg/m <sup>2</sup>        | 25.7 $\pm$ 4.1                 | 26.0 $\pm$ 4.4  |
| Low leisure time physical activity, % (no.) <sup>b</sup> | 15.5 (1,820)                   | 20.4 (490)      |
| Education $\geq$ 13 years, % (no.)                       | 26.0 (3,059)                   | 23.3 (559)      |
| Depression and/or anxiety (HADS score $\geq$ 8), % (no.) | 11.8 (1,385)                   | 34.1 (817)      |
| Current smoker, % (no.)                                  | 15.7 (1,852)                   | 18.7 (447)      |

Abbreviation: HADS, Hospital Anxiety and Depression Scale; SD, standard deviation

<sup>a</sup> Participants were classified with insomnia symptoms if they answered “Often/always” on at least one the questions about “Problems falling asleep” and “Waking up too early” or “Yes” on the question about “Impaired work ability due to sleep problems”.

<sup>b</sup> Defined as <1 h light activity per week.

Table 2 shows the association between insomnia symptoms and risk of fibromyalgia. The risk of fibromyalgia increased with number of insomnia symptoms, i.e., compared to women without insomnia symptoms, women who reported one, two or three symptoms had RRs of 1.39 (95% CI 1.08-1.80), 1.86 (95% CI 1.33-2.59) and 2.66 (95% CI 1.75-4.06), respectively. When all symptoms of insomnia were collapsed into one group, women who reported one or more insomnia symptoms had a RR of 1.64 (95% CI 1.34-2.02), compared to women with no insomnia symptoms.

**Table 2.** Risk of fibromyalgia at 11-year follow-up associated with baseline insomnia symptoms.

| Insomnia symptoms              | No. of persons | No. of cases | Age-adjusted, RR <sup>a</sup> | Multi-adjusted, RR <sup>b</sup> (95% CI) |
|--------------------------------|----------------|--------------|-------------------------------|------------------------------------------|
| No. of symptoms <sup>c</sup>   |                |              |                               |                                          |
| 0                              | 11,775         | 334          | 1.00                          | 1.00 (reference)                         |
| 1                              | 1,566          | 71           | 1.60                          | 1.39 (1.08-1.80)                         |
| 2                              | 612            | 40           | 2.36                          | 1.86 (1.33-2.59)                         |
| 3                              | 219            | 21           | 3.53                          | 2.66 (1.75-4.06)                         |
| Insomnia symptoms <sup>d</sup> |                |              |                               |                                          |
| No                             | 11,775         | 334          | 1.00                          | 1.00 (reference)                         |
| Yes                            | 2,397          | 132          | 1.96                          | 1.64 (1.34-2.02)                         |

Abbreviations: BMI, body mass index; CI, confidence interval; RR, risk ratio

<sup>a</sup> Adjusted for age (20-29 years, 30-39 years, 40-49 years, 50-59 years, 60-69 years,  $\geq 70$  years).

<sup>b</sup> Adjusted for age (20-29 years, 30-39 years, 40-49 years, 50-59 years, 60-69 years,  $\geq 70$  years), body mass index (18.5-24.9 kg/m<sup>2</sup>, 25.0-29.9 kg/m<sup>2</sup>,  $\geq 30$  kg/m<sup>2</sup>), leisure time physical activity (high activity, moderate activity, low activity), education (primary school, high school, college  $\leq 4$  years, college  $\geq 4$  years, unknown), The Hospital Anxiety and Depression Scale (no depression and no anxiety, depression and/or anxiety, unknown), smoking (never, former, current smoker, unknown).

<sup>c</sup> No. of symptoms were defined by adding up those who responded "Often/always" on the questions about "Problems falling asleep" and "Waking up too early" and "Yes" on the question about "Impaired work ability due to sleep problems".

<sup>d</sup> Participants were classified with insomnia symptoms if they answered "Often/always" on at least one the questions about "Problems falling asleep" and "Waking up too early" or "Yes" on the question about "Impaired work ability due to sleep problems".

Table 3 shows the joint association between insomnia symptoms and leisure time physical activity on risk of fibromyalgia. Compared to the reference group of highly physically active women with no insomnia symptoms, women with one or more insomnia symptoms had RRs of 1.90 (95% CI 1.30-2.79) if they reported low activity and 1.55 (95% CI 1.12-2.13) if they reported to be highly physically active. Further, women without insomnia symptoms who reported low physical activity had a RR of 0.95 (95% CI 0.69-1.29). The RERI estimate between insomnia symptoms and leisure time physical activity on risk of fibromyalgia was 0.40 (95% CI -0.37 - 1.19).

**Table 3.** The joint effect of insomnia symptoms and leisure time physical activity on risk of fibromyalgia at 11-year follow-up.

| Physical activity     | No insomnia symptoms |              |                                         | Insomnia symptoms <sup>a</sup> |              |                                         |
|-----------------------|----------------------|--------------|-----------------------------------------|--------------------------------|--------------|-----------------------------------------|
|                       | No. of persons       | No. of cases | Multi-adjusted <sup>b</sup> RR (95% CI) | No. of persons                 | No. of cases | Multi-adjusted <sup>b</sup> RR (95% CI) |
| High <sup>c</sup>     | 5,770                | 156          | 1.00 (reference)                        | 990                            | 49           | 1.55 (1.12-2.13)                        |
| Moderate <sup>d</sup> | 4,185                | 125          | 1.05 (0.82-1.34)                        | 917                            | 49           | 1.63 (1.18-2.25)                        |
| Low <sup>e</sup>      | 1,820                | 53           | 0.95 (0.69-1.29)                        | 490                            | 34           | 1.90 (1.30-2.79)                        |

Abbreviations: CI, confidence interval; RR, risk ratio.

<sup>a</sup> Participants were classified to have insomnia symptoms if they answered “Often/always” on one of the questions about “Problems falling asleep” and “Waking up too early” or “Yes” on the question about “Impaired work ability due to sleep problems”.

<sup>b</sup> Adjusted for age (20-29 years, 30-39 years, 40-49 years, 50-59 years, 60-69 years,  $\geq 70$  years), body mass index (18.5-24.9 kg/m<sup>2</sup>, 25.0-29.9 kg/m<sup>2</sup>,  $\geq 30$  kg/m<sup>2</sup>), education (primary school, high school, college  $\leq 4$  years, college  $\geq 4$  years, unknown), The Hospital Anxiety and Depression Scale (no depression and no anxiety, depression and/or anxiety, unknown), smoking (never, former, current smoker, unknown).

<sup>c</sup> Any hard activity per week

<sup>d</sup>  $\geq 1$ h light and no hard activity per week

<sup>e</sup>  $< 1$  h light activity per week

Table 4 shows the joint association between insomnia symptoms and BMI on risk of fibromyalgia. There was no evidence of interaction, i.e., the RERI estimate between insomnia symptoms and BMI was -0.01 (95% CI -0.99 - 0.97).

**Table 4.** The joint effect of insomnia symptoms and body mass index on risk of fibromyalgia at 11-year follow-up.

| Body mass index (BMI, kg/m <sup>2</sup> )    | No insomnia symptoms |              |                                         | Insomnia symptoms <sup>a</sup> |              |                                         |
|----------------------------------------------|----------------------|--------------|-----------------------------------------|--------------------------------|--------------|-----------------------------------------|
|                                              | No. of persons       | No. of cases | Multi-adjusted <sup>b</sup> RR (95% CI) | No. of persons                 | No. of cases | Multi-adjusted <sup>b</sup> RR (95% CI) |
| Normal weight (18.5-24.9 kg/m <sup>2</sup> ) | 5,818                | 136          | 1.00 (reference)                        | 1,125                          | 52           | 1.64 (1.20-2.25)                        |
| Overweight (25.0-29.9 kg/m <sup>2</sup> )    | 4,336                | 138          | 1.35 (1.07-1.70)                        | 889                            | 56           | 2.35 (1.73-3.21)                        |
| Obese ( $\geq 30$ kg/m <sup>2</sup> )        | 1,621                | 60           | 1.55 (1.14-2.10)                        | 383                            | 24           | 2.18 (1.42-3.35)                        |

Abbreviations: CI, confidence interval; RR, risk ratio.

<sup>a</sup> Participants were classified to have insomnia symptoms if they answered “Often/always” on one of the questions about “Problems falling asleep” and “Waking up too early” or “Yes” on the question about “Impaired work ability due to sleep problems”.

<sup>b</sup> Adjusted for age (20-29 years, 30-39 years, 40-49 years, 50-59 years, 60-69 years,  $\geq 70$  years), leisure time physical activity (high activity, moderate activity, low activity), education (primary school, high school, college  $\leq 4$  years, college  $\geq 4$  years, unknown), The Hospital Anxiety and Depression Scale (no depression and no anxiety, depression and/or anxiety, unknown), smoking (never, former, current smoker, unknown).

### Supplementary analyses

The supplementary analysis, including hypnotics and/or sedatives as a covariate in the multiadjusted models had negligible effect on the estimated associations. The association between number of insomnia symptoms and risk of fibromyalgia became somewhat attenuated when adjusting for number of chronic pain sites, i.e., women who reported one, two or three symptoms had RRs of 1.04 (95% CI 0.81-1.35), 1.30 (95% CI 0.94-1.80) and 1.67 (95% CI 1.10-2.53), respectively. Comparing highly active vs. inactive (no light and no hard activity) strengthened the association, i.e., compared to women with high physical activity and no insomnia symptoms, women with insomnia symptoms who also reported to be inactive had a RR of 2.04 (1.10-3.80).



## DISCUSSION

The results from this large longitudinal study indicate a strong and independent association between insomnia symptoms and increased risk of fibromyalgia. The risk increased with number of insomnia symptoms and was more than twofold higher among women who reported three or more symptoms compared to women who reported no symptoms. High level of leisure time physical activity may to some extent attenuate the adverse effect of insomnia symptoms on risk of fibromyalgia. We found no synergistic effect of insomnia symptoms and BMI, but overweight and obese women with insomnia symptoms had more than twofold increased risk of fibromyalgia compared to normal weight women with no insomnia symptoms.

Prospective studies have shown that sleep problems increase the risk of localized [11] and generalized chronic pain [17, 18]. However, the different definitions of both sleep problems and pain limit the possibility to directly compare our results with previous findings. In a large longitudinal study based on a previous wave of the HUNT study, we showed that sleep problems were strongly and positively associated with risk of fibromyalgia in women at 10-11 years follow up [19]. However, the study had several methodological limitations, e.g., sleep problems were assessed by a single question and baseline information about fibromyalgia and chronic pain was not available. More recently, two studies based on the same data as the current study showed that a proxy of the DSM-IV criteria for insomnia was associated with increased risk of fibromyalgia [9] and chronic widespread pain [17]. The current study extends on these findings by showing the contribution of number of insomnia symptoms in the development of fibromyalgia. Taken together, these findings suggest that reducing mild and severe sleep problems may be an important target to reduce the incidence of fibromyalgia. The underlying mechanisms that explain why women with insomnia symptoms are more susceptible to develop fibromyalgia is uncertain but can be related to the

1  
2  
3 possible relation between sleep and central sensitization of the nervous system [20]. For  
4  
5 instance, sleep restriction and poor sleep quality may impair endogenous nociceptive-  
6  
7 inhibitory function and increase pain [21], as well as induce generalized hyperalgesia in  
8  
9 otherwise healthy people [22]. Further, there may exist a link between poor sleep and low-  
10  
11 graded inflammation [23], which is supported by experimental studies showing that pro-  
12  
13 inflammatory cytokines can be involved in the development of hyperalgesia [24-26].  
14  
15

16  
17 Our results show that moderate and high leisure time physical activity may modify the  
18  
19 adverse effect of insomnia symptoms on risk of fibromyalgia. Although the precision in our  
20  
21 analysis of additive interaction was low, the estimate suggest a synergistic effect of insomnia  
22  
23 symptoms and leisure time physical activity on risk of fibromyalgia. This result is partly in  
24  
25 line with a previous study showing that leisure time physical activity to some extent  
26  
27 compensate the risk of mild sleep problems on chronic pain in low back and neck/shoulders  
28  
29 [11]. However, sleep problems were assessed by a single question and the definition of leisure  
30  
31 time physical activity differed from the current study. Further, it is likely that pain in low back  
32  
33 and neck/shoulder represent a condition in nature from fibromyalgia, and that insomnia  
34  
35 symptoms and physical activity influence these pain conditions differently. Interestingly, the  
36  
37 beneficial effect of moderate and high physical activity was present only among women with  
38  
39 symptoms of insomnia. The explanation for this finding remains undetermined, but it is  
40  
41 possible that the anti-inflammatory effect of physical activity [27, 28] reduces inflammation  
42  
43 induced by disturbed sleep and short sleep duration [29, 30]. Further, some evidence has  
44  
45 demonstrated exercise induced hypoalgesia and improvements in symptoms of fibromyalgia  
46  
47 after a single low-intensity bout of physical exercise [31], indicating that exercise may reduce  
48  
49 pain perception [32] and increase pain tolerance [33]. Thus, our findings underscore the  
50  
51 importance of recreational physical activity to reduce the risk of fibromyalgia in persons with  
52  
53 symptoms of insomnia.  
54  
55  
56  
57  
58  
59  
60

1  
2  
3 Although excessive body weight has been linked to increased risk of fibromyalgia  
4 [12], we found no evidence that BMI modified the effect of insomnia symptoms on  
5 fibromyalgia risk. However, a high BMI was associated with an increased risk of  
6 fibromyalgia within all strata of insomnia symptoms.  
7  
8  
9  
10

11  
12 Strengths of the current study include the prospective design, the large study sample of  
13 women, and the ability to adjust for several potential confounding factors. Further, the large  
14 sample size allowed us analyze the joint effect of insomnia symptoms and lifestyle factors.  
15  
16 Some limitations should also be considered when interpreting the results. First, no  
17 information about the time of the fibromyalgia diagnosis was collected and fibromyalgia was  
18 assessed by self-reports at both HUNT2 and HUNT3. These questions have not been  
19 validated and some of the women may not have met the American College of Rheumatology  
20 1990 classification criteria for a diagnosis of fibromyalgia [34]. It should also be noted that  
21 HUNT2 and HUNT3 were carried out before the classification criteria for fibromyalgia was  
22 revised in 2010 [35]. Second, our classification of insomnia is somewhat different from the  
23 International Classification of Sleep Disorders (ICSD-3) criteria for insomnia diagnosis [36].  
24 For instance, the questions on sleep in HUNT2 only refer to symptoms the last month and the  
25 question on impaired daytime function in HUNT2 is only related to work ability. Further, the  
26 questions on sleep in HUNT2 do not capture whether the insomnia symptoms occur despite  
27 adequate opportunity and conditions for sleep or if they are explained by another sleep  
28 disorder. Further, the assessment of leisure time physical activity was based on self-report.  
29  
30 Finally, it should be noted that insomnia symptoms, leisure time physical activity and BMI  
31 were collected only at the baseline survey, and we have no data on changes to these variables  
32 during the follow-up period.  
33  
34  
35  
36  
37  
38  
39  
40  
41  
42  
43  
44  
45  
46  
47  
48  
49  
50  
51  
52  
53  
54

55  
56 In conclusion, insomnia symptoms are associated with increased risk of fibromyalgia  
57 in adult women. Notably, the risk increases proportionally with number of insomnia  
58  
59  
60

1  
2  
3 symptoms. Leisure time physical activity may modify some of the adverse effect of insomnia  
4  
5 symptoms on risk of fibromyalgia. These findings indicate that preventing sleep problems and  
6  
7 promoting a healthy active lifestyle are important targets to reduce the incidence of  
8  
9  
10 fibromyalgia.  
11  
12  
13  
14  
15  
16

#### 17 ACKNOWLEDGEMENT

18  
19 This work was supported by a grant to Eivind Schjelderup Skarpsno from the Liaison  
20  
21 Committee between the Central Norway Regional Health Authority (RHA) and the  
22  
23 Norwegian University of Science and Technology (NTNU). The Nord-Trøndelag Health  
24  
25 Study (HUNT) is a collaboration between the HUNT Research Centre (Faculty of Medicine  
26  
27 and Health Sciences, Norwegian University of Science and Technology), the Nord-Trøndelag  
28  
29 County Council and the Norwegian Institute of Public Health.  
30  
31  
32  
33  
34  
35  
36  
37

#### 38 AUTHOR CONTRIBUTIONS

39  
40 Study concept and design: All authors. Drafting of the manuscript: ESS. Critical revision of  
41  
42 the manuscript: All authors. Statistical analysis: ESS. Interpretation of data: All authors.  
43  
44 Critical revision: All authors. Final approval: All authors.  
45  
46  
47  
48

49 Conflict of interest: Authors declare no conflicts of interest.  
50  
51  
52  
53  
54  
55  
56  
57  
58  
59  
60

## REFERENCES

- 1 Sarzi-Puttini P, Atzeni F, Mease PJ. Chronic widespread pain: From peripheral to central evolution. *Best Pract Res Clin Rheumatol* 2011;25:133-9.
- 2 Sluka KA, Clauw DJ. Neurobiology of fibromyalgia and chronic widespread pain. *Neuroscience* 2016;338:114-29.
- 3 Martínez-Lavín M, Hermosillo AG. Autonomic nervous system dysfunction may explain the multisystem features of fibromyalgia. *Semin Arthritis Rheum* 2000;29:197-9.
- 4 Gran JT. The epidemiology of chronic generalized musculoskeletal pain. *Best Pract Res Clin Rheumatol* 2003;17:547-61.
- 5 Bigatti SM, Hernandez AM, Cronan TA, *et al.* Sleep disturbances in fibromyalgia syndrome: relationship to pain and depression. *Arthritis Rheum* 2008;59:961-7.
- 6 Diaz-Piedra C, Catena A, Sanchez AI, *et al.* Sleep disturbances in fibromyalgia syndrome: the role of clinical and polysomnographic variables explaining poor sleep quality in patients. *Sleep Med* 2015;16:917-25.
- 7 Skarpsno ES, Nilsen TIL, Sand T, *et al.* Do physical activity and body mass index modify the association between chronic musculoskeletal pain and insomnia? Longitudinal data from the HUNT study, Norway. *J Sleep Res* 2018;27:32-9.
- 8 Mork P, Nilsen T. Sleep problems and risk of fibromyalgia: longitudinal data on an adult female population in Norway. *Arthritis and rheumatism* 2012;64:281-4.
- 9 Sivertsen B, Lallukka T, Salo P, *et al.* Insomnia as a risk factor for ill health: results from the large population-based prospective HUNT Study in Norway. *J Sleep Res* 2014;23:124-32.
- 10 McBeth J, Lacey RJ, Wilkie R. Predictors of new-onset widespread pain in older adults: results from a population-based prospective cohort study in the UK. *Arthritis Rheumatol* 2014;66:757-67.
- 11 Mork PJ, Vik KL, Moe B, *et al.* Sleep problems, exercise and obesity and risk of chronic musculoskeletal pain: The Norwegian HUNT study. *Eur J Public Health* 2014;24:924-9.
- 12 Mork P, Vasseljen O, Nilsen T. Association between physical exercise, body mass index, and risk of fibromyalgia: Longitudinal data from the Norwegian Nord-Trøndelag Health Study. *Arthritis Care Res (Hoboken)* 2010;62:611-7.

- 1  
2  
3 13 World Health Organization. Physical status: the use of and interpretation of  
4 anthropometry. Report of a WHO expert committee. Technical Report Series no.854. WHO,  
5 Geneva, 1995.  
6  
7  
8 14 Bjelland I, Dahl AA, Haug TT, *et al.* The validity of the Hospital Anxiety and  
9 Depression Scale. An updated literature review. *J Psychosom Res* 2002;52:69-77.  
10  
11 15 Lisspers J, Nygren A, Söderman E. Hospital Anxiety and Depression Scale (HAD):  
12 some psychometric data for a Swedish sample. *Acta Psychiatr Scand* 1997;96:281-6.  
13  
14 16 Andersson T, Alfredsson L, Kallberg H, *et al.* Calculating measures of biological  
15 interaction. *Eur J Epidemiol* 2005;20:575-9.  
16  
17 17 Uhlig BL, Sand T, Nilsen TI, *et al.* Insomnia and risk of chronic musculoskeletal  
18 complaints: longitudinal data from the HUNT study, Norway. *BMC Musculoskelet Disord*  
19 2018;19:128.  
20  
21 22 Nitter AK, Pripp AH, Forseth KØ. Are sleep problems and non-specific health  
23 complaints risk factors for chronic pain? A prospective population-based study with 17 year  
24 follow-up. *Scand J Pain* 2012;3:210-7.  
25  
26 27 Mork PJ, Nilsen TIL. Sleep problems and risk of fibromyalgia: Longitudinal data on  
28 an adult female population in Norway. *Arthritis & Rheumatism* 2012;64:281-4.  
29  
30 31 Nijs J, Loggia ML, Polli A, *et al.* Sleep disturbances and severe stress as glial  
32 activators: key targets for treating central sensitization in chronic pain patients? *Expert Opin*  
33 *Ther Targets* 2017;21:817-26.  
34  
35 36 Smith MT, Edwards RR, McCann UD, *et al.* The effects of sleep deprivation on pain  
37 inhibition and spontaneous pain in women. *Sleep* 2007;30:494-505.  
38  
39 40 Schuh-Hofer S, Wodarski R, Pfau DB, *et al.* One night of total sleep deprivation  
41 promotes a state of generalized hyperalgesia: a surrogate pain model to study the relationship  
42 of insomnia and pain. *Pain* 2013;154:1613-21.  
43  
44 45 Haack M, Sanchez E, Mullington JM. Elevated inflammatory markers in response to  
46 prolonged sleep restriction are associated with increased pain experience in healthy  
47 volunteers. *Sleep* 2007;30:1145-52.  
48  
49 50 Dina OA, Green PG, Levine JD. Role of interleukin-6 in chronic muscle hyperalgesic  
51 priming. *Neuroscience* 2008;152:521-5.  
52  
53 54 Uceyler N, Eberle T, Rolke R, *et al.* Differential expression patterns of cytokines in  
55 complex regional pain syndrome. *Pain* 2007;132:195-205.  
56  
57  
58  
59  
60

- 1  
2  
3 26 Sommer C, Kress M. Recent findings on how proinflammatory cytokines cause pain:  
4 peripheral mechanisms in inflammatory and neuropathic hyperalgesia. *Neurosci Lett*  
5 2004;361:184-7.  
6  
7  
8 27 Hamer M, Sabia S, Batty GD, *et al.* Physical activity and inflammatory markers over  
9 10 years follow-up in men and women from the Whitehall II Cohort Study. *Circulation*  
10 2012;126:928-33.  
11  
12  
13 28 Das UN. Anti-inflammatory nature of exercise. *Nutrition* 2004;20:323-6.  
14  
15 29 Okun ML, Coussons-Read M, Hall M. Disturbed sleep is associated with increased C-  
16 reactive protein in young women. *Brain Behav Immun* 2009;23:351-4.  
17  
18 30 Chiang JK. Short Duration of Sleep Is Associated with Elevated High-Sensitivity C-  
19 Reactive Protein Level in Taiwanese Adults: A Cross-Sectional Study. *J Clin Sleep*  
20 *Med*;10:743-9.  
21  
22  
23 31 Newcomb LW, Koltyn KF, Morgan WP, *et al.* Influence of preferred versus  
24 prescribed exercise on pain in fibromyalgia. *Med Sci Sports Exerc* 2011;43:1106-13.  
25  
26 32 Hoffman MD, Hoffman DR. Does aerobic exercise improve pain perception and  
27 mood? A review of the evidence related to healthy and chronic pain subjects. *Curr Pain*  
28 *Headache Rep* 2007;11:93-7.  
29  
30 33 Jones MD, Booth J, Taylor JL, *et al.* Aerobic training increases pain tolerance in  
31 healthy individuals. *Med Sci Sports Exerc* 2014;46:1640-7.  
32  
33 34 Wolfe F, Smythe HA, Yunus MB, *et al.* The American College of Rheumatology 1990  
34 criteria for the classification of Fibromyalgia. *Arthritis & Rheumatism* 1990;33:160-72.  
35  
36 35 Wolfe F, Clauw DJ, Fitzcharles MA, *et al.* The American College of Rheumatology  
37 preliminary diagnostic criteria for fibromyalgia and measurement of symptom severity.  
38 *Arthritis Care Res (Hoboken)* 2010;62:600-10.  
39  
40 36 American Academy of Sleep Medicine. International Classification of Sleep Disorders  
41 re, American Academy of Sleep Medicine, Darien, IL 2014.  
42  
43  
44  
45  
46  
47  
48  
49  
50  
51  
52  
53  
54  
55  
56  
57  
58  
59  
60

# BMJ Open

## The joint effect of insomnia symptoms and lifestyle factors on risk of self-reported fibromyalgia in women: Longitudinal data from the HUNT study

|                                 |                                                                                                                                                                                                                                                                                                                                                                                                                                                                                                                                                                                                                                                                                                                                                                                                                                                                                                                                                                 |
|---------------------------------|-----------------------------------------------------------------------------------------------------------------------------------------------------------------------------------------------------------------------------------------------------------------------------------------------------------------------------------------------------------------------------------------------------------------------------------------------------------------------------------------------------------------------------------------------------------------------------------------------------------------------------------------------------------------------------------------------------------------------------------------------------------------------------------------------------------------------------------------------------------------------------------------------------------------------------------------------------------------|
| Journal:                        | <i>BMJ Open</i>                                                                                                                                                                                                                                                                                                                                                                                                                                                                                                                                                                                                                                                                                                                                                                                                                                                                                                                                                 |
| Manuscript ID                   | bmjopen-2018-028684.R1                                                                                                                                                                                                                                                                                                                                                                                                                                                                                                                                                                                                                                                                                                                                                                                                                                                                                                                                          |
| Article Type:                   | Research                                                                                                                                                                                                                                                                                                                                                                                                                                                                                                                                                                                                                                                                                                                                                                                                                                                                                                                                                        |
| Date Submitted by the Author:   | 26-Jun-2019                                                                                                                                                                                                                                                                                                                                                                                                                                                                                                                                                                                                                                                                                                                                                                                                                                                                                                                                                     |
| Complete List of Authors:       | Skarpsno, Eivind; Norges Teknisk Naturvitenskapelige Universitet Institutt for Samfunnsmedisin, Department of Public Health and Nursing; Department of Neurology and Clinical Neurophysiology, St. Olavs Hospital, Trondheim, Norway<br>Nilsen, Tom; Norwegian University of Science and Technology, Department of Public Health and Nursing<br>Sand, Trond; St. Olav Hospital, Department of Neurology and Clinical Neurophysiology, St. Olavs Hospital, Trondheim, Norway; Norwegian University of Science and Technology, Department of Neuromedicine and Movement Science, Norwegian University of Science and Technology (NTNU), Trondheim, Norway<br>Hagen, Knut; St. Olav Hospital, Department of Neurology and Clinical Neurophysiology; Norwegian University of Science and Technology , Department of Neuromedicine and Movement Science<br>Mork, Paul Jarle; Norwegian University of Science and Technology, Department of Public Health and Nursing |
| <b>Primary Subject Heading</b>: | Epidemiology                                                                                                                                                                                                                                                                                                                                                                                                                                                                                                                                                                                                                                                                                                                                                                                                                                                                                                                                                    |
| Secondary Subject Heading:      | Public health, Epidemiology, Rheumatology                                                                                                                                                                                                                                                                                                                                                                                                                                                                                                                                                                                                                                                                                                                                                                                                                                                                                                                       |
| Keywords:                       | Insomnia, PUBLIC HEALTH, Fibromyalgia, Physical activity, Body mass index, Exercise                                                                                                                                                                                                                                                                                                                                                                                                                                                                                                                                                                                                                                                                                                                                                                                                                                                                             |
|                                 |                                                                                                                                                                                                                                                                                                                                                                                                                                                                                                                                                                                                                                                                                                                                                                                                                                                                                                                                                                 |

SCHOLARONE™  
Manuscripts



1  
2  
3 **The joint effect of insomnia symptoms and lifestyle factors on risk of self-reported**  
4 **fibromyalgia in women: Longitudinal data from the HUNT study**  
5

6  
7 Eivind Schjelderup Skarpsno<sup>1,2</sup>, Tom Ivar Lund Nilsen<sup>1,3</sup>, Trond Sand<sup>2,4</sup>, Knut Hagen<sup>2,4,5</sup>,  
8  
9 Paul Jarle Mork<sup>1</sup>  
10  
11

12  
13 <sup>1</sup>Department of Public Health and Nursing, Norwegian University of Science and Technology  
14 (NTNU), Trondheim, Norway, <sup>2</sup>Department of Neurology and Clinical Neurophysiology, St.  
15 Olavs Hospital, Trondheim, Norway, <sup>3</sup>Clinic of Anaesthesia and Intensive Care, St Olavs  
16 Hospital, Trondheim University Hospital, Trondheim, Norway, <sup>4</sup>Department of  
17 Neuromedicine and Movement Science, Norwegian University of Science and Technology  
18 (NTNU), Trondheim, Norway, <sup>5</sup>Norwegian National Headache Centre, St. Olavs Hospital,  
19 Trondheim, Norway  
20  
21  
22  
23  
24  
25  
26  
27  
28  
29  
30  
31

32 **Corresponding author:**

33 Eivind Schjelderup Skarpsno

34 Department of Public Health and Nursing, Norwegian University of Science and Technology  
35 (NTNU), 7491 Trondheim, Norway.

36 E-mail: [eivind.s.skarpsno@ntnu.no](mailto:eivind.s.skarpsno@ntnu.no)

37 ORCID ID: <https://orcid.org/0000-0002-4135-0408>

38 Telephone: +4797521297  
39  
40  
41  
42  
43  
44  
45  
46  
47  
48  
49

50 Word count: 2975

51 Number of tables: 4  
52  
53  
54  
55  
56

57 The authors declare no conflicts of interest.  
58  
59  
60

## ABSTRACT

**Objectives:** To investigate the association between insomnia symptoms and risk of self-reported fibromyalgia in women, and to estimate if leisure time physical activity and body mass index (BMI) modify this association.

**Design:** Prospective cohort study.

**Setting:** We used longitudinal data from the Norwegian HUNT Study collected in 1995-1997 (baseline) and 2006-2008 (follow-up).

**Participants:** A total of 14,172 women who reported to be free from fibromyalgia at baseline.

**Primary outcome measures:** We estimated adjusted risk ratios (RRs) with 95% confidence interval (CI) for self-reported fibromyalgia at follow-up associated with baseline insomnia symptoms, leisure time physical activity and BMI.

**Results:** Overall, 466 incident cases of fibromyalgia were reported during the ~11 years follow-up period, corresponding to a crude absolute risk (AR) of 3.3%. Compared to women without insomnia symptoms (crude AR = 2.8%), women who reported one, two or three symptoms had RRs of fibromyalgia of 1.39 (95% CI 1.08-1.80), 1.86 (95% CI 1.33-2.59) and 2.66 (95% CI 1.75-4.06), respectively. Compared to highly physically active women without insomnia symptoms (crude AR = 2.7%), women with one or more insomnia symptoms had a RR of fibromyalgia of 1.90 (95% CI 1.30-2.79) if they reported low physical activity and a RR of 1.55 (95% CI 1.12-2.13) if they reported high physical activity. We found no synergistic effect between insomnia symptoms and BMI on risk of fibromyalgia; however, overweight and obese women with one or more insomnia symptoms had RRs of 2.35 (95% CI 1.73-3.21) and 2.18 (95% CI 1.42-3.35) compared to the reference group of normal weight women without insomnia symptoms (crude AR = 2.3%).

1  
2  
3 **Conclusions:** Insomnia symptoms are strongly and positively associated with risk of  
4  
5 fibromyalgia in adult women. Leisure time physical activity may compensate for some of the  
6  
7 adverse effect of insomnia symptoms on risk of fibromyalgia.  
8  
9

10 **Key word** Insomnia, fibromyalgia, physical activity, body mass index, exercise, overweight  
11  
12  
13

#### 14 **Strengths and limitations of this study**

- 15  
16  
17 - The strengths of the current study include the prospective design, the large study  
18  
19 sample of women, and the possibility to adjust for several potential confounding  
20  
21 factors.  
22  
23  
24 - Fibromyalgia was assessed by self-reports at both baseline and follow-up.  
25  
26  
27 - The questions on sleep at baseline referred to symptoms the last month and the  
28  
29 question on impaired daytime function was only related to work ability.  
30  
31  
32 - The questions on sleep did not capture whether the insomnia symptoms occur despite  
33  
34 adequate opportunity and conditions for sleep or if they were explained by another  
35  
36 sleep disorder.  
37  
38 - We have no information about changes to insomnia symptoms, leisure time physical  
39  
40 activity and BMI during the follow-up.  
41  
42  
43  
44  
45  
46  
47  
48  
49  
50  
51  
52  
53  
54  
55  
56  
57  
58  
59  
60

## INTRODUCTION

Fibromyalgia is a musculoskeletal pain syndrome with chronic widespread pain as the main symptom [1, 2]. The etiology and pathophysiology remain undetermined, but a disturbance in the central regulation of pain seems to be an important contributor to the development of fibromyalgia [3]. Depending on the diagnostic criteria used, the prevalence of fibromyalgia is between 2% and 7% in the general adult population but up to fourfold higher among women than men [4].

Almost all women with fibromyalgia report some sleep problems [5], and several studies applying polysomnographic recordings have documented signs of disordered sleep in fibromyalgia [6]. This is not surprising considering that chronic widespread pain has been identified as a strong and independent risk factor for insomnia [7]. Conversely, epidemiological studies indicate that insomnia symptoms increase the risk of fibromyalgia and widespread pain among an otherwise healthy population [8-10]. For instance, we have in a longitudinal study showed that sleep problems were strongly and positively associated with risk of fibromyalgia [8]. However, this study had several methodological limitations, e.g., sleep problems were assessed by a single question and baseline information about fibromyalgia was not available. More recently, two longitudinal studies have shown that insomnia symptoms are associated with increased risk of fibromyalgia and widespread pain in a working population [9] and among elderly [10]. Although these latter studies indicate an independent association between insomnia symptoms and risk of fibromyalgia, it is not clear if number of insomnia symptoms is dose-dependently associated with risk of fibromyalgia and if lifestyle factors can modify this association.

Some evidence indicates that leisure time physical activity and maintenance of normal body weight to some extent can reduce the adverse effect of sleep problems on risk of chronic pain in the low back and neck/shoulders [11]. Furthermore, excessive body weight may

1  
2  
3 represent an independent risk factor of fibromyalgia [12], whereas regular physical activity  
4  
5 seems to reduce risk of fibromyalgia [12]. Thus, it is conceivable that leisure time physical  
6  
7 activity and obesity influence the association between insomnia symptoms and risk of  
8  
9 fibromyalgia. Improved knowledge about the interplay between insomnia symptoms and  
10  
11 lifestyle factors would be valuable for improved prevention of fibromyalgia.  
12  
13

14           The aim of the current study was to investigate the prospective association between  
15  
16 insomnia symptoms and risk of self-reported fibromyalgia in women, and to explore if leisure  
17  
18 time physical activity and body mass index (BMI) modify this association.  
19  
20  
21  
22  
23  
24  
25  
26  
27  
28  
29  
30  
31  
32  
33  
34  
35  
36  
37  
38  
39  
40  
41  
42  
43  
44  
45  
46  
47  
48  
49  
50  
51  
52  
53  
54  
55  
56  
57  
58  
59  
60

## MATERIALS AND METHODS

### Study population

This prospective population-based study utilizes longitudinal data on women participating in the Nord-Trøndelag Health Study (the HUNT Study). All inhabitants in the Nord-Trøndelag County in Norway aged 20 years or older were invited to participate in three consecutive surveys; first in 1984-1986 (HUNT1), then in 1995-1997 (HUNT2) and last in 2006-2008 (HUNT3). Information on lifestyle and health-related factors were collected by questionnaires and a clinical examination at all three surveys. The invitation files were created from periodically updated census data from Statistics Norway. In the second and third survey, the invitation letter was sent by mail attached along with a three-page questionnaire. This questionnaire was returned when the participants attended the clinical examination. At the clinical examination, the participants were given a second questionnaire that they were asked to complete at home and return in a pre-stamped envelope. More detailed information about the HUNT Study can be found at <http://www.ntnu.edu/hunt>.

Information on fibromyalgia and insomnia symptoms were not collected at HUNT1, and the current study is therefore based on data from HUNT2 and HUNT3. At the HUNT2 baseline survey, a total of 47,312 women were invited and 75.5% (n=35,280) participated. At the HUNT3 follow-up survey, 47,293 women were invited and 58.7% (n= 27,758) participated. In the current study, we used data from the 20,415 women who participated in both HUNT2 and HUNT3. Of these, we excluded 1,159 women who reported fibromyalgia at baseline at HUNT2. Further, we excluded women with incomplete baseline information on insomnia symptoms (n=3,541) and leisure time physical activity (n=761). Moreover, 161 women defined as underweight (BMI<18.5kg/m<sup>2</sup>) were excluded due to possible pre-clinical disease that could influence insomnia, lifestyle factors or fibromyalgia. Of the remaining

1  
2  
3 14,793 women, 14,172 answered the question about fibromyalgia at the follow-up survey  
4  
5 (HUNT3).  
6

7  
8 All participants signed a written consent, and the study was approved by the Regional  
9  
10 Committee for Ethics in Medical Research (project no. 2014/612 REK midt). The study was  
11  
12 carried out according to the Declaration of Helsinki.  
13  
14

### 15 16 17 **Fibromyalgia**

18  
19 At baseline, women reported physician diagnosed fibromyalgia according to the following  
20  
21 question: “Has a doctor ever said that you have fibromyalgia (fibrositis/chronic pain  
22  
23 syndrome)?”, with response options “Yes” or “No”. At follow-up, incident fibromyalgia was  
24  
25 identified by the question “Have you had, or do you have fibromyalgia?”, with response  
26  
27 options “Yes” or “No”.  
28  
29  
30  
31  
32

### 33 **Insomnia symptoms**

34  
35 At baseline, classification of insomnia symptoms was based on the following three questions:  
36  
37 1) “During the last month, have you had problems falling asleep?”, 2) “During the last month,  
38  
39 did you ever wake up too early, not being able to fall asleep again?” and 3) “During the last  
40  
41 year, have you been troubled by insomnia to such a degree that it influenced your work  
42  
43 ability?”. Question 1 and 2 had the response options: “Never”, “Occasionally”, “Often”, and  
44  
45 “Almost every night”, whereas question 3 had the response options “No” and “Yes”.  
46  
47  
48 Participants were classified to have insomnia symptoms if they answered, “Often” or “Almost  
49  
50 every night” on at least one of the questions 1-2 or “Yes” on question 3.  
51  
52  
53  
54  
55

### 56 **Body mass index**

57  
58  
59  
60

1  
2  
3 Standardized measurements of body height (to the nearest centimeter) and weight (to the  
4 nearest half kilogram) obtained at the clinical examination at baseline was used to calculate  
5 BMI ( $\text{kg}/\text{m}^2$ ). Participants were then classified according to cut-offs suggested by the World  
6 Health Organization [13]: normal weight (BMI 18.5-24.9  $\text{kg}/\text{m}^2$ ), overweight (BMI 25.0-29.9  
7  $\text{kg}/\text{m}^2$ ), or obese (BMI  $\geq 30.0$   $\text{kg}/\text{m}^2$ ). Women defined as underweight (BMI  $< 18.5$   $\text{kg}/\text{m}^2$ )  
8 were excluded from the analyses to reduce the possibility of reverse causation due to  
9 undetected disease.  
10  
11  
12  
13  
14  
15  
16  
17  
18  
19  
20

### 21 **Leisure time physical activity**

22  
23 At baseline, leisure time physical activity was assessed by the question: “How much of your  
24 leisure time have you been physically active during the last year? (Think of a weekly average  
25 for the year. Your commute to work counts as leisure time)”. The participants were then  
26 asked to specify number of hours per week of light (no sweating or heavy breathing) and/or  
27 hard (sweating and heavy breathing) physical activity with the response options: “None”, “ $< 1$   
28 hour”, “1-2 hours” and “ $\geq 3$  hours” for both light and hard activity. Based on this information,  
29 we constructed a new variable with three categories combining information on light and hard  
30 activity: low activity ( $< 1$  h light and no hard activity), moderate activity ( $\geq 1$  h light and no  
31 hard activity) and high activity (any hard activity).  
32  
33  
34  
35  
36  
37  
38  
39  
40  
41  
42  
43  
44  
45  
46

### 47 **Other variables**

48  
49 Potential confounders were assessed at baseline. Age was determined from the Norwegian  
50 national identity number and categorized into “20-29 years”, “30-39 years”, “40-49 years”,  
51 “50-59 years”, “60-69 years”, “ $\geq 70$  years”. Education was assessed by the question: “What is  
52 your highest level of education?” and divided in four categories: “Primary school”, “High  
53 school”, “College  $\leq 4$  years” and “College  $> 4$  years”. The Hospital Anxiety and Depression  
54  
55  
56  
57  
58  
59  
60



1  
2  
3 Scale (HADS) was used to assess symptoms of anxiety and depression. HADS is a validated  
4 and well-established self-rating questionnaire including seven questions on anxiety and seven  
5 questions on depression [14]. As recommended, the cut-off score was set to  $\geq 8$  on both  
6 anxiety and depression and were dichotomized as presence or no presence of anxiety and/or  
7 depression [14, 15]. Smoking was assessed by questions about past and present smoking and  
8 then divided into three categories: “Never smoked”, “Former smoker” and “Current smoker”.  
9  
10 Chronic musculoskeletal pain was assessed by the question: “During the last year, have you  
11 had pain and/or stiffness in your muscles and limbs that has lasted for at least 3 consecutive  
12 months?”. Response options were “Yes” and “No”. If answering “Yes”, the participants were  
13 asked to indicate the affected body area(s): neck, shoulders, elbows, wrists/hands, upper back,  
14 low back, hips, knees, ankles/feet (i.e., a maximum of nine chronic pain sites). We then  
15 constructed a new variable using number of chronic musculoskeletal pain sites to categorize  
16 participants into four strata: No chronic pain, 1-2 chronic pain sites, 3-4 chronic pain sites,  
17 and  $\geq 5$  chronic pain sites. Use of hypnotics and/or sedatives were assessed by the question:  
18 “How often have you taken sedatives or sleep medication in the last month?” with the  
19 response options “Daily”, “Weekly, but not every day”, “Not as often as every week”, and  
20 “Never”.  
21  
22  
23  
24  
25  
26  
27  
28  
29  
30  
31  
32  
33  
34  
35  
36  
37  
38  
39  
40  
41  
42  
43  
44

### 45 **Statistical analysis**

46 A modified Poisson regression was used to estimate risk ratios (RRs) of fibromyalgia  
47 associated with insomnia symptoms and number of insomnia symptoms. The precision of the  
48 RRs was assessed by 95% confidence intervals (CIs) using robust variance estimation.  
49  
50 Women with insomnia symptoms were compared with the reference group of women with no  
51 insomnia symptoms. Crude estimates of absolute risk (AR) were calculated for the total  
52 sample, as well as for each of the reference categories to help determine the clinical  
53  
54  
55  
56  
57  
58  
59  
60

1  
2  
3 importance of the associations. All associations were adjusted for potential confounding by  
4 age (20-29, 30-39, 40-49, 50-59 years), BMI (18.5-24.9 kg/m<sup>2</sup>, 25.0-29.9 kg/m<sup>2</sup>, ≥30 kg/m<sup>2</sup>),  
5  
6 leisure time physical activity (high activity, moderate activity, low activity), education  
7  
8 (primary school, high school, college ≤4 years, college >4 years, unknown), and smoking  
9  
10 (never, former smoker, current smoker, unknown). Further, since anxiety and/or depression  
11  
12 are associated with both fibromyalgia and insomnia symptoms, we included HADS (no  
13  
14 anxiety or depression, anxiety and/or depression, unknown) in the multi-adjusted model.  
15  
16  
17  
18

19 We estimated the joint effect of insomnia symptoms and leisure time physical activity  
20 on risk of fibromyalgia, using highly physically active women without insomnia symptoms as  
21 the reference group. Further, in the analysis of the joint effect of insomnia symptoms and  
22 BMI on risk of fibromyalgia, normal weight women without insomnia symptoms formed the  
23 reference group. These analyses were adjusted for all the potential confounders described  
24 above (excluding the variable under study). Potential effect modification between the  
25 variables was assessed as departure from additive effects calculating the relative excess risk  
26 due to interaction (RERI). We calculated RERI estimates with 95% CIs by the following  
27 equation:  $RERI = RR_{\text{low activity and insomnia symptoms}} - RR_{\text{high activity and insomnia symptoms}} - RR_{\text{low activity and}}$   
28  $no\ insomnia\ symptoms + 1$  [16], i.e., RERI >0 indicates a synergistic effect beyond an additive effect.  
29  
30  
31  
32  
33  
34  
35  
36  
37  
38  
39  
40  
41  
42  
43  
44  
45  
46  
47  
48  
49  
50  
51  
52  
53  
54  
55  
56  
57  
58  
59  
60  
The same RERI calculation was performed for the joint effect of BMI and insomnia  
symptoms.

Supplementary analyses were conducted to assess the robustness of the results. First,  
we included use of hypnotics and/or sedatives as a covariate in the multi-adjusted models.  
Likewise, since some persons with multisite pain may have undiagnosed fibromyalgia, we  
included number of chronic pain sites (no chronic pain, 1-2 chronic pain sites, 3-4 chronic  
pain sites, ≥5 chronic pain sites) as a covariate in the multi-adjusted models. Finally, in the  
analyses of joint effect, we attempted to classify the participants into more contrasting

1  
2  
3 categories of physical activity, i.e., we excluded 1,686 women who reported to be physically  
4  
5 active <1 h per week from the group of low physical activity.  
6

7 All statistical analyses were performed using Stata for Windows, version 13.1  
8  
9 (StataCorp LP, College Station, Texas).  
10  
11  
12  
13

#### 14 **Patient and public involvement**

15  
16 No patients were involved in the development and design of this prospective study.  
17  
18  
19  
20  
21  
22  
23  
24  
25  
26  
27  
28  
29  
30  
31  
32  
33  
34  
35  
36  
37  
38  
39  
40  
41  
42  
43  
44  
45  
46  
47  
48  
49  
50  
51  
52  
53  
54  
55  
56  
57  
58  
59  
60

For peer review only

## RESULTS

Table 1 presents the baseline characteristics of the 14,172 participants stratified by the presence of insomnia symptoms. The proportion of women who reported one or more insomnia symptoms at baseline (HUNT2) was 20% (2,397 women). Overall, 466 incident cases of fibromyalgia were reported during the ~11 years follow-up period (crude AR = 3.3%).

**Table 1.** Baseline characteristics of the study population stratified by insomnia symptoms.

|                                                          | Insomnia symptoms <sup>a</sup> |                 |
|----------------------------------------------------------|--------------------------------|-----------------|
|                                                          | No                             | Yes             |
| Participants, no.                                        | 11,775                         | 2,397           |
| Age, mean $\pm$ SD, years                                | 43.5 $\pm$ 12.0                | 47.0 $\pm$ 11.8 |
| Body mass index, mean $\pm$ SD, kg/m <sup>2</sup>        | 25.7 $\pm$ 4.1                 | 26.0 $\pm$ 4.4  |
| Obese, % (no.)                                           | 13.8 (1,621)                   | 16.0 (383)      |
| Leisure time physical activity, % (no.)                  |                                |                 |
| Low <sup>b</sup>                                         | 15.5 (1,820)                   | 20.4 (490)      |
| Moderate <sup>c</sup>                                    | 35.5 (4,185)                   | 38.3 (917)      |
| High <sup>d</sup>                                        | 49.0 (5,770)                   | 41.3 (990)      |
| Education $\geq$ 13 years, % (no.)                       | 26.0 (3,059)                   | 23.3 (559)      |
| Unknown                                                  | 1.0 (120)                      | 1.5 (35)        |
| Depression and/or anxiety (HADS score $\geq$ 8), % (no.) | 11.8 (1,385)                   | 34.1 (817)      |
| Unknown                                                  | 10.7 (1,265)                   | 15.0 (359)      |
| Current smoker, % (no.)                                  | 15.7 (1,852)                   | 18.7 (447)      |
| Unknown                                                  | 20.4 (2,407)                   | 23.1 (554)      |

Abbreviation: HADS, Hospital Anxiety and Depression Scale; SD, standard deviation

<sup>a</sup> Participants were classified with insomnia symptoms if they answered “Often/always” on at least one of the questions about “Problems falling asleep” and “Waking up too early” or “Yes” on the question about “Impaired work ability due to sleep problems”.

<sup>b</sup> Defined as <1 h light activity per week.

<sup>c</sup> Defined as  $\geq$ 1 h light and no hard activity.

<sup>d</sup> Defined as any hard activity.

Table 2 shows the association between insomnia symptoms and risk of fibromyalgia. The risk of fibromyalgia increased with number of insomnia symptoms, i.e., compared to women without insomnia symptoms (AR = 2.8%), women who reported one, two or three symptoms had RRs of 1.39 (95% CI 1.08-1.80), 1.86 (95% CI 1.33-2.59) and 2.66 (95% CI 1.75-4.06), respectively (Table 2). When all symptoms of insomnia were merged into one group, women

who reported one or more insomnia symptoms had a RR of 1.64 (95% CI 1.34-2.02), compared to women with no insomnia symptoms (Table 2).

**Table 2.** Risk of fibromyalgia at 11-year follow-up associated with baseline insomnia symptoms.

| Insomnia symptoms              | No. of persons | No. of cases | Age-adjusted, RR <sup>a</sup> | Multi-adjusted, RR <sup>b</sup> (95% CI) |
|--------------------------------|----------------|--------------|-------------------------------|------------------------------------------|
| No. of symptoms <sup>c</sup>   |                |              |                               |                                          |
| 0                              | 11,775         | 334          | 1.00                          | 1.00 (reference)                         |
| 1                              | 1,566          | 71           | 1.60                          | 1.39 (1.08-1.80)                         |
| 2                              | 612            | 40           | 2.36                          | 1.86 (1.33-2.59)                         |
| 3                              | 219            | 21           | 3.53                          | 2.66 (1.75-4.06)                         |
| Insomnia symptoms <sup>d</sup> |                |              |                               |                                          |
| No                             | 11,775         | 334          | 1.00                          | 1.00 (reference)                         |
| Yes                            | 2,397          | 132          | 1.96                          | 1.64 (1.34-2.02)                         |

Abbreviations: CI, confidence interval; RR, risk ratio

<sup>a</sup> Adjusted for age (20-29 years, 30-39 years, 40-49 years, 50-59 years, 60-69 years,  $\geq 70$  years).

<sup>b</sup> Adjusted for age (20-29 years, 30-39 years, 40-49 years, 50-59 years, 60-69 years,  $\geq 70$  years), body mass index (18.5-24.9 kg/m<sup>2</sup>, 25.0-29.9 kg/m<sup>2</sup>,  $\geq 30$  kg/m<sup>2</sup>), leisure time physical activity (high activity, moderate activity, low activity), education (primary school, high school, college  $\leq 4$  years, college  $\geq 4$  years, unknown), The Hospital Anxiety and Depression Scale (no depression and no anxiety, depression and/or anxiety, unknown), smoking (never, former, current smoker, unknown).

<sup>c</sup> No. of symptoms were defined by adding up those who responded "Often/always" on the questions about "Problems falling asleep" and "Waking up too early" and "Yes" on the question about "Impaired work ability due to sleep problems".

<sup>d</sup> Participants were classified with insomnia symptoms if they answered "Often/always" on at least one of the questions about "Problems falling asleep" and "Waking up too early" or "Yes" on the question about "Impaired work ability due to sleep problems".

Table 3 shows the joint association between insomnia symptoms and leisure time physical activity on risk of fibromyalgia. Compared to the reference group of highly physically active women with no insomnia symptoms (AR = 2.7%), women with one or more insomnia symptoms had RRs of 1.90 (95% CI 1.30-2.79) if they reported low activity and 1.55 (95% CI 1.12-2.13) if they reported to be highly physically active (Table 3). Further, women without insomnia symptoms who reported low physical activity had a RR of 0.95 (95% CI 0.69-1.29).

The RERI estimate between insomnia symptoms and leisure time physical activity on risk of fibromyalgia was 0.40 (95% CI -0.37-1.19).

**Table 3.** The joint effect of insomnia symptoms and leisure time physical activity on risk of fibromyalgia at 11-year follow-up.

| Physical activity     | No insomnia symptoms |              |                                         | Insomnia symptoms <sup>a</sup> |              |                                         |
|-----------------------|----------------------|--------------|-----------------------------------------|--------------------------------|--------------|-----------------------------------------|
|                       | No. of persons       | No. of cases | Multi-adjusted <sup>b</sup> RR (95% CI) | No. of persons                 | No. of cases | Multi-adjusted <sup>b</sup> RR (95% CI) |
| High <sup>c</sup>     | 5,770                | 156          | 1.00 (reference)                        | 990                            | 49           | 1.55 (1.12-2.13)                        |
| Moderate <sup>d</sup> | 4,185                | 125          | 1.05 (0.82-1.34)                        | 917                            | 49           | 1.63 (1.18-2.25)                        |
| Low <sup>e</sup>      | 1,820                | 53           | 0.95 (0.69-1.29)                        | 490                            | 34           | 1.90 (1.30-2.79)                        |

Abbreviations: CI, confidence interval; RR, risk ratio.

<sup>a</sup> Participants were classified to have insomnia symptoms if they answered “Often/always” on one of the questions about “Problems falling asleep” and “Waking up too early” or “Yes” on the question about “Impaired work ability due to sleep problems”.

<sup>b</sup> Adjusted for age (20-29 years, 30-39 years, 40-49 years, 50-59 years, 60-69 years,  $\geq 70$  years), body mass index (18.5-24.9 kg/m<sup>2</sup>, 25.0-29.9 kg/m<sup>2</sup>,  $\geq 30$  kg/m<sup>2</sup>), education (primary school, high school, college  $\leq 4$  years, college  $\geq 4$  years, unknown), The Hospital Anxiety and Depression Scale (no depression and no anxiety, depression and/or anxiety, unknown), smoking (never, former, current smoker, unknown).

<sup>c</sup> Any hard activity per week

<sup>d</sup>  $\geq 1$ h light and no hard activity per week

<sup>e</sup>  $< 1$  h light activity per week

Table 4 shows the joint association between insomnia symptoms and BMI on risk of fibromyalgia. There was no evidence of interaction, i.e., the RERI estimate between insomnia symptoms and BMI was -0.01 (95% CI -0.99-0.97).

**Table 4.** The joint effect of insomnia symptoms and body mass index on risk of fibromyalgia at 11-year follow-up.

| Body mass index                              | No insomnia symptoms |              |                                         | Insomnia symptoms <sup>a</sup> |              |                                         |
|----------------------------------------------|----------------------|--------------|-----------------------------------------|--------------------------------|--------------|-----------------------------------------|
|                                              | No. of persons       | No. of cases | Multi-adjusted <sup>b</sup> RR (95% CI) | No. of persons                 | No. of cases | Multi-adjusted <sup>b</sup> RR (95% CI) |
| Normal weight (18.5-24.9 kg/m <sup>2</sup> ) | 5,818                | 136          | 1.00 (reference)                        | 1,125                          | 52           | 1.64 (1.20-2.25)                        |
| Overweight (25.0-29.9 kg/m <sup>2</sup> )    | 4,336                | 138          | 1.35 (1.07-1.70)                        | 889                            | 56           | 2.35 (1.73-3.21)                        |
| Obese ( $\geq 30$ kg/m <sup>2</sup> )        | 1,621                | 60           | 1.55 (1.14-2.10)                        | 383                            | 24           | 2.18 (1.42-3.35)                        |

Abbreviations: CI, confidence interval; RR, risk ratio.

<sup>a</sup> Participants were classified to have insomnia symptoms if they answered “Often/always” on one of the questions about “Problems falling asleep” and “Waking up too early” or “Yes” on the question about “Impaired work ability due to sleep problems”.

1  
2  
3 <sup>b</sup> Adjusted for age (20-29 years, 30-39 years, 40-49 years, 50-59 years, 60-69 years, ≥70  
4 years), leisure time physical activity (high activity, moderate activity, low activity), education  
5 (primary school, high school, college ≤4 years, college ≥4 years, unknown), The Hospital  
6 Anxiety and Depression Scale (no depression and no anxiety, depression and/or anxiety,  
7 unknown), smoking (never, former, current smoker, unknown).  
8  
9

### 10 11 Supplementary analyses 12

13  
14 The supplementary analysis, including hypnotics and/or sedatives as a covariate in the multi-  
15 adjusted models had negligible effect on the estimated associations. The association between  
16 number of insomnia symptoms and risk of fibromyalgia became somewhat attenuated when  
17 adjusting for number of chronic pain sites (no chronic pain, 1-2 chronic pain sites, 3-4 chronic  
18 pain sites, ≥5 chronic pain sites), i.e., women who reported one, two or three insomnia  
19 symptoms had RRs of 1.04 (95% CI 0.81-1.35), 1.30 (95% CI 0.94-1.80) and 1.67 (95% CI  
20 1.10-2.53), respectively. Comparing inactive (no light and no hard activity) women to highly  
21 active women strengthened the association, i.e., inactive women with insomnia symptoms had  
22 a RR of 2.04 (1.10-3.80) compared to highly active women without insomnia symptoms.  
23  
24  
25  
26  
27  
28  
29  
30  
31  
32  
33  
34  
35  
36  
37  
38  
39  
40  
41  
42  
43  
44  
45  
46  
47  
48  
49  
50  
51  
52  
53  
54  
55  
56  
57  
58  
59  
60

## DISCUSSION

The results from this prospective study indicate a strong and independent association between insomnia symptoms and risk of fibromyalgia. The risk increased with number of insomnia symptoms and was more than twofold higher among women who reported three or more symptoms compared to women who reported no symptoms. High level of leisure time physical activity may to some extent attenuate the adverse effect of insomnia symptoms on risk of fibromyalgia. We found no synergistic effect of insomnia symptoms and BMI, but overweight and obese women with insomnia symptoms had more than twofold increased risk of fibromyalgia compared to normal weight women with no insomnia symptoms.

Prospective studies have shown that sleep problems increase the risk of localized [11] and generalized chronic pain [17, 18]. However, the different definitions of both sleep problems and pain limit the possibility to directly compare our results with previous findings. In a large longitudinal study based on a previous wave of the HUNT study, we showed that sleep problems were strongly and positively associated with risk of fibromyalgia in women at 10-11 years follow up [19]. However, the study had several methodological limitations, e.g., sleep problems were assessed by a single question and baseline information about fibromyalgia and chronic pain was not available. More recently, two studies based on the same data as the current study showed that a proxy of the DSM-IV criteria for insomnia was associated with increased risk of fibromyalgia [9] and chronic widespread pain [17]. The current study extends on these findings by showing the dose-dependent association between number of insomnia symptoms and risk of fibromyalgia. Taken together, these findings suggest that reducing both mild and severe sleep problems may be an important target to reduce the incidence of fibromyalgia. The underlying mechanism for the association between insomnia symptoms and susceptibility to develop fibromyalgia is unclear but can be related to the possible relation between sleep problems and central sensitization of the nervous system



1  
2  
3 [20]. For instance, sleep restriction and poor sleep quality may impair endogenous  
4  
5 nociceptive-inhibitory function and increase pain [21], as well as induce generalized  
6  
7 hyperalgesia in otherwise healthy people [22]. Further, there may exist a link between poor  
8  
9 sleep and low-graded inflammation [23], which is supported by experimental studies showing  
10  
11 that pro-inflammatory cytokines can be involved in the development of hyperalgesia [24-26].  
12  
13

14  
15 Our results show that moderate and high leisure time physical activity may modify the  
16  
17 adverse effect of insomnia symptoms on risk of fibromyalgia. Although the precision in our  
18  
19 analysis of additive interaction was low, the estimate suggests a synergistic effect of insomnia  
20  
21 symptoms and leisure time physical activity on risk of fibromyalgia. This result is partly in  
22  
23 line with a previous study showing that leisure time physical activity to some extent  
24  
25 compensate the risk of mild sleep problems on chronic pain in low back and neck/shoulders  
26  
27 [11]. However, sleep problems were assessed by a single question and the definition of leisure  
28  
29 time physical activity differed from the current study. Further, it is possible that pain in the  
30  
31 low back and neck/shoulder represent a condition that differs in nature from fibromyalgia, and  
32  
33 that insomnia symptoms and physical activity influence these pain conditions differently.  
34  
35 Interestingly, in the current study the beneficial effect of moderate and high physical activity  
36  
37 was present only among women with symptoms of insomnia. A possible explanation for this  
38  
39 finding is that the anti-inflammatory effect of physical activity [27, 28] reduces inflammation  
40  
41 induced by disturbed sleep and short sleep duration [29, 30]. This notion is supported by  
42  
43 studies showing that a single bout of low-intensity physical exercise can induce hypoalgesia  
44  
45 and improve fibromyalgia symptoms [31], indicating that physical exercise reduces pain  
46  
47 perception [32] and increases pain tolerance [33]. Although the exact underlying mechanism  
48  
49 remains undetermined, our findings suggest that regular recreational physical activity may  
50  
51 reduce the risk of fibromyalgia in persons with symptoms of insomnia.  
52  
53  
54  
55  
56  
57  
58  
59  
60

1  
2  
3 Although excessive body weight has been linked to increased risk of fibromyalgia  
4 [12], we found no evidence that BMI modifies the effect of insomnia symptoms on risk of  
5 fibromyalgia. However, a high BMI was associated with an increased risk of fibromyalgia  
6 within all strata of insomnia symptoms.  
7  
8  
9  
10

11  
12 Strengths of the current study include the prospective design, the large study sample,  
13 and the possibility to adjust for several potential confounding factors. Further, the large  
14 sample size allowed us analyse the joint effect of insomnia symptoms and lifestyle factors.  
15  
16 Some limitations should also be considered when interpreting the results. First, no  
17 information about the time of the fibromyalgia diagnosis was collected and fibromyalgia was  
18 assessed by self-reports at both baseline and follow-up. These questions have not been  
19 validated and some of the women may not have met the American College of Rheumatology  
20 1990 classification criteria for a diagnosis of fibromyalgia [34]. It should also be noted that  
21 the data collection was carried out before the classification criteria for fibromyalgia was  
22 revised in 2010 [35]. Further, we cannot exclude the possibility that women reporting  
23 multisite pain have undiagnosed fibromyalgia. Second, our classification of insomnia is  
24 somewhat different from the International Classification of Sleep Disorders (ICSD-3) criteria  
25 for insomnia diagnosis [36]. For instance, the questions on sleep in HUNT2 only refer to  
26 symptoms the last month and the question on impaired daytime function in HUNT2 is only  
27 related to work ability. Further, the questions on sleep in HUNT2 do not capture whether the  
28 insomnia symptoms occur despite adequate opportunity and conditions for sleep or if they are  
29 explained by another sleep disorder. Further, the assessment of leisure time physical activity  
30 was based on self-report. It should also be noted that insomnia symptoms, leisure time  
31 physical activity and BMI were collected only at the baseline survey, and we have no data on  
32 changes to these variables during the follow-up period. Finally, the study population consisted  
33 of a heterogenous group of women, and future studies should investigate whether there exist  
34  
35  
36  
37  
38  
39  
40  
41  
42  
43  
44  
45  
46  
47  
48  
49  
50  
51  
52  
53  
54  
55  
56  
57  
58  
59  
60

1  
2  
3 subgroups where insomnia symptoms and lifestyle factors have different impact on risk of  
4  
5 fibromyalgia.  
6

7  
8 In conclusion, insomnia symptoms are associated with increased risk of fibromyalgia  
9  
10 in adult women. Notably, the risk increases proportionally with number of insomnia  
11  
12 symptoms. Leisure time physical activity may modify some of the adverse effect of insomnia  
13  
14 symptoms on risk of fibromyalgia. These findings indicate that preventing sleep problems and  
15  
16 promoting a healthy active lifestyle are important to reduce the incidence of fibromyalgia.  
17  
18  
19  
20  
21  
22

## 23 ACKNOWLEDGEMENT

24  
25 This work was supported by a grant to Eivind Schjelderup Skarpsno from the Liaison  
26  
27 Committee between the Central Norway Regional Health Authority (RHA) and the  
28  
29 Norwegian University of Science and Technology (NTNU) (project number: 46056929). The  
30  
31 Nord-Trøndelag Health Study (HUNT) is a collaboration between the HUNT Research Centre  
32  
33 (Faculty of Medicine and Health Sciences, Norwegian University of Science and  
34  
35 Technology), the Nord-Trøndelag County Council and the Norwegian Institute of Public  
36  
37 Health.  
38  
39  
40  
41  
42  
43  
44

## 45 AUTHOR CONTRIBUTIONS

46  
47 Study concept and design: ESS, TILN, TS, KH, PJM. Drafting of the manuscript: ESS.  
48  
49 Critical revision of the manuscript: ESS, TILN, TS, KH, PJM. Statistical analysis: ESS.  
50  
51 Interpretation of data: ESS, TILN, TS, KH, PJM. Final approval of the version to be  
52  
53 published: ESS, TILN, TS, KH, PJM.  
54  
55  
56  
57

58 Conflict of interest: Authors declare no conflicts of interest.  
59  
60

## DATA AVAILABILITY STATEMENT

Data used for this study were derived from The Nord-Trøndelag Health Study (HUNT), <https://www.ntnu.edu/hunt>. Any research group with a Principal Investigator affiliated with a Norwegian research institute can apply for access to analyse HUNT data. This means that research groups from non-Norwegian countries must find a collaboration partner in Norway to be able to use HUNT material. Each project needs to be approved by the HUNT Data Access Committee (DAC), regional Medical Ethical Committee, in some cases also the Data Inspectorate. Due to participant confidentiality, participant data is not publicly available.

**REFERENCES**

- 1 Sarzi-Puttini P, Atzeni F, Mease PJ. Chronic widespread pain: From peripheral to central evolution. *Best Pract Res Clin Rheumatol* 2011;25:133-9.
- 2 Sluka KA, Clauw DJ. Neurobiology of fibromyalgia and chronic widespread pain. *Neuroscience* 2016;338:114-29.
- 3 Martínez-Lavín M, Hermosillo AG. Autonomic nervous system dysfunction may explain the multisystem features of fibromyalgia. *Semin Arthritis Rheum* 2000;29:197-9.
- 4 Gran JT. The epidemiology of chronic generalized musculoskeletal pain. *Best Pract Res Clin Rheumatol* 2003;17:547-61.
- 5 Bigatti SM, Hernandez AM, Cronan TA, *et al.* Sleep disturbances in fibromyalgia syndrome: relationship to pain and depression. *Arthritis Rheum* 2008;59:961-7.
- 6 Diaz-Piedra C, Catena A, Sanchez AI, *et al.* Sleep disturbances in fibromyalgia syndrome: the role of clinical and polysomnographic variables explaining poor sleep quality in patients. *Sleep Med* 2015;16:917-25.
- 7 Skarpsno ES, Nilsen TIL, Sand T, *et al.* Do physical activity and body mass index modify the association between chronic musculoskeletal pain and insomnia? Longitudinal data from the HUNT study, Norway. *J Sleep Res* 2018;27:32-9.
- 8 Mork P, Nilsen T. Sleep problems and risk of fibromyalgia: longitudinal data on an adult female population in Norway. *Arthritis and rheumatism* 2012;64:281-4.
- 9 Sivertsen B, Lallukka T, Salo P, *et al.* Insomnia as a risk factor for ill health: results from the large population-based prospective HUNT Study in Norway. *J Sleep Res* 2014;23:124-32.
- 10 McBeth J, Lacey RJ, Wilkie R. Predictors of new-onset widespread pain in older adults: results from a population-based prospective cohort study in the UK. *Arthritis Rheumatol* 2014;66:757-67.
- 11 Mork PJ, Vik KL, Moe B, *et al.* Sleep problems, exercise and obesity and risk of chronic musculoskeletal pain: The Norwegian HUNT study. *Eur J Public Health* 2014;24:924-9.
- 12 Mork P, Vasseljen O, Nilsen T. Association between physical exercise, body mass index, and risk of fibromyalgia: Longitudinal data from the Norwegian Nord-Trøndelag Health Study. *Arthritis Care Res (Hoboken)* 2010;62:611-7.

- 1  
2  
3 13 World Health Organization. Physical status: the use of and interpretation of  
4 anthropometry. Report of a WHO expert committee. Technical Report Series no.854. WHO,  
5 Geneva, 1995.  
6  
7  
8 14 Bjelland I, Dahl AA, Haug TT, *et al.* The validity of the Hospital Anxiety and  
9 Depression Scale. An updated literature review. *J Psychosom Res* 2002;52:69-77.  
10  
11 15 Lisspers J, Nygren A, Söderman E. Hospital Anxiety and Depression Scale (HAD):  
12 some psychometric data for a Swedish sample. *Acta Psychiatr Scand* 1997;96:281-6.  
13  
14 16 Andersson T, Alfredsson L, Kallberg H, *et al.* Calculating measures of biological  
15 interaction. *Eur J Epidemiol* 2005;20:575-9.  
16  
17 17 Uhlig BL, Sand T, Nilsen TI, *et al.* Insomnia and risk of chronic musculoskeletal  
18 complaints: longitudinal data from the HUNT study, Norway. *BMC Musculoskelet Disord*  
19 2018;19:128.  
20  
21 22  
22 23  
23 24 Nitter AK, Pripp AH, Forseth KØ. Are sleep problems and non-specific health  
24 complaints risk factors for chronic pain? A prospective population-based study with 17 year  
25 follow-up. *Scand J Pain* 2012;3:210-7.  
26  
27 28  
28 29 Mork PJ, Nilsen TIL. Sleep problems and risk of fibromyalgia: Longitudinal data on  
29 an adult female population in Norway. *Arthritis & Rheumatism* 2012;64:281-4.  
30  
31 32  
31 32 Nijs J, Loggia ML, Polli A, *et al.* Sleep disturbances and severe stress as glial  
32 activators: key targets for treating central sensitization in chronic pain patients? *Expert Opin*  
33 *Ther Targets* 2017;21:817-26.  
34  
35 36  
35 36 Smith MT, Edwards RR, McCann UD, *et al.* The effects of sleep deprivation on pain  
36 inhibition and spontaneous pain in women. *Sleep* 2007;30:494-505.  
37  
38 39  
37 38 Schuh-Hofer S, Wodarski R, Pfau DB, *et al.* One night of total sleep deprivation  
38 promotes a state of generalized hyperalgesia: a surrogate pain model to study the relationship  
39 of insomnia and pain. *Pain* 2013;154:1613-21.  
40  
41 42  
39 40 Haack M, Sanchez E, Mullington JM. Elevated inflammatory markers in response to  
40 prolonged sleep restriction are associated with increased pain experience in healthy  
41 volunteers. *Sleep* 2007;30:1145-52.  
42  
43 44  
41 42 Dina OA, Green PG, Levine JD. Role of interleukin-6 in chronic muscle hyperalgesic  
42 priming. *Neuroscience* 2008;152:521-5.  
43  
44 45  
43 44 Uceyler N, Eberle T, Rolke R, *et al.* Differential expression patterns of cytokines in  
44 complex regional pain syndrome. *Pain* 2007;132:195-205.  
45  
46 47  
45 46  
46 47  
47 48  
46 47  
47 48  
48 49  
47 48  
48 49  
49 50  
48 49  
49 50  
50 51  
49 50  
50 51  
51 52  
50 51  
51 52  
52 53  
51 52  
52 53  
53 54  
52 53  
53 54  
54 55  
53 54  
54 55  
54 55  
55 56  
54 55  
55 56  
56 57  
55 56  
56 57  
57 58  
56 57  
57 58  
58 59  
57 58  
58 59  
59 60  
60

- 1  
2  
3 26 Sommer C, Kress M. Recent findings on how proinflammatory cytokines cause pain:  
4 peripheral mechanisms in inflammatory and neuropathic hyperalgesia. *Neurosci Lett*  
5 2004;361:184-7.  
6  
7  
8 27 Hamer M, Sabia S, Batty GD, *et al.* Physical activity and inflammatory markers over  
9 10 years follow-up in men and women from the Whitehall II Cohort Study. *Circulation*  
10 2012;126:928-33.  
11  
12  
13 28 Das UN. Anti-inflammatory nature of exercise. *Nutrition* 2004;20:323-6.  
14  
15 29 Okun ML, Coussons-Read M, Hall M. Disturbed sleep is associated with increased C-  
16 reactive protein in young women. *Brain Behav Immun* 2009;23:351-4.  
17  
18 30 Chiang JK. Short Duration of Sleep Is Associated with Elevated High-Sensitivity C-  
19 Reactive Protein Level in Taiwanese Adults: A Cross-Sectional Study. *J Clin Sleep*  
20 *Med*;10:743-9.  
21  
22  
23 31 Newcomb LW, Koltyn KF, Morgan WP, *et al.* Influence of preferred versus  
24 prescribed exercise on pain in fibromyalgia. *Med Sci Sports Exerc* 2011;43:1106-13.  
25  
26 32 Hoffman MD, Hoffman DR. Does aerobic exercise improve pain perception and  
27 mood? A review of the evidence related to healthy and chronic pain subjects. *Curr Pain*  
28 *Headache Rep* 2007;11:93-7.  
29  
30 33 Jones MD, Booth J, Taylor JL, *et al.* Aerobic training increases pain tolerance in  
31 healthy individuals. *Med Sci Sports Exerc* 2014;46:1640-7.  
32  
33 34 Wolfe F, Smythe HA, Yunus MB, *et al.* The American College of Rheumatology 1990  
34 criteria for the classification of Fibromyalgia. *Arthritis & Rheumatism* 1990;33:160-72.  
35  
36 35 Wolfe F, Clauw DJ, Fitzcharles MA, *et al.* The American College of Rheumatology  
37 preliminary diagnostic criteria for fibromyalgia and measurement of symptom severity.  
38 *Arthritis Care Res (Hoboken)* 2010;62:600-10.  
39  
40 36 American Academy of Sleep Medicine. International Classification of Sleep Disorders  
41 re, American Academy of Sleep Medicine, Darien, IL 2014.  
42  
43  
44  
45  
46  
47  
48  
49  
50  
51  
52  
53  
54  
55  
56  
57  
58  
59  
60

**STROBE 2007 (v4) Statement—Checklist of items that should be included in reports of *cohort studies***

| Section/Topic                | Item # | Recommendation                                                                                                                                                                       | Reported on page # |
|------------------------------|--------|--------------------------------------------------------------------------------------------------------------------------------------------------------------------------------------|--------------------|
| <b>Title and abstract</b>    | 1      | (a) Indicate the study's design with a commonly used term in the title or the abstract                                                                                               | 1                  |
|                              |        | (b) Provide in the abstract an informative and balanced summary of what was done and what was found                                                                                  | 2                  |
| <b>Introduction</b>          |        |                                                                                                                                                                                      |                    |
| Background/rationale         | 2      | Explain the scientific background and rationale for the investigation being reported                                                                                                 | 4-5                |
| Objectives                   | 3      | State specific objectives, including any prespecified hypotheses                                                                                                                     | 5                  |
| <b>Methods</b>               |        |                                                                                                                                                                                      |                    |
| Study design                 | 4      | Present key elements of study design early in the paper                                                                                                                              | 6                  |
| Setting                      | 5      | Describe the setting, locations, and relevant dates, including periods of recruitment, exposure, follow-up, and data collection                                                      | 6                  |
| Participants                 | 6      | (a) Give the eligibility criteria, and the sources and methods of selection of participants. Describe methods of follow-up                                                           | 6                  |
|                              |        | (b) For matched studies, give matching criteria and number of exposed and unexposed                                                                                                  |                    |
| Variables                    | 7      | Clearly define all outcomes, exposures, predictors, potential confounders, and effect modifiers. Give diagnostic criteria, if applicable                                             | 7-9                |
| Data sources/<br>measurement | 8*     | For each variable of interest, give sources of data and details of methods of assessment (measurement). Describe comparability of assessment methods if there is more than one group | 7-9                |
| Bias                         | 9      | Describe any efforts to address potential sources of bias                                                                                                                            | 9-10               |
| Study size                   | 10     | Explain how the study size was arrived at                                                                                                                                            | 6-7                |
| Quantitative variables       | 11     | Explain how quantitative variables were handled in the analyses. If applicable, describe which groupings were chosen and why                                                         | 9-10               |
| Statistical methods          | 12     | (a) Describe all statistical methods, including those used to control for confounding                                                                                                | 9-10               |
|                              |        | (b) Describe any methods used to examine subgroups and interactions                                                                                                                  | 10                 |
|                              |        | (c) Explain how missing data were addressed                                                                                                                                          | 9-10               |
|                              |        | (d) If applicable, explain how loss to follow-up was addressed                                                                                                                       | 6-7                |
|                              |        | (e) Describe any sensitivity analyses                                                                                                                                                | 10                 |
| <b>Results</b>               |        |                                                                                                                                                                                      |                    |



|                          |     |                                                                                                                                                                                                              |          |
|--------------------------|-----|--------------------------------------------------------------------------------------------------------------------------------------------------------------------------------------------------------------|----------|
| Participants             | 13* | (a) Report numbers of individuals at each stage of study—eg numbers potentially eligible, examined for eligibility, confirmed eligible, included in the study, completing follow-up, and analysed            | 8-9      |
|                          |     | (b) Give reasons for non-participation at each stage                                                                                                                                                         | 6-7      |
|                          |     | (c) Consider use of a flow diagram                                                                                                                                                                           |          |
| Descriptive data         | 14* | (a) Give characteristics of study participants (eg demographic, clinical, social) and information on exposures and potential confounders                                                                     | 11       |
|                          |     | (b) Indicate number of participants with missing data for each variable of interest                                                                                                                          | 12       |
|                          |     | (c) Summarise follow-up time (eg, average and total amount)                                                                                                                                                  | 2; 12    |
| Outcome data             | 15* | Report numbers of outcome events or summary measures over time                                                                                                                                               | 11-14    |
| Main results             | 16  | (a) Give unadjusted estimates and, if applicable, confounder-adjusted estimates and their precision (eg, 95% confidence interval). Make clear which confounders were adjusted for and why they were included | 12-14    |
|                          |     | (b) Report category boundaries when continuous variables were categorized                                                                                                                                    | 8-9      |
|                          |     | (c) If relevant, consider translating estimates of relative risk into absolute risk for a meaningful time period                                                                                             | 2; 12-13 |
| Other analyses           | 17  | Report other analyses done—eg analyses of subgroups and interactions, and sensitivity analyses                                                                                                               | 10-11    |
| <b>Discussion</b>        |     |                                                                                                                                                                                                              |          |
| Key results              | 18  | Summarise key results with reference to study objectives                                                                                                                                                     | 15       |
| <b>Limitations</b>       |     |                                                                                                                                                                                                              |          |
| Interpretation           | 20  | Give a cautious overall interpretation of results considering objectives, limitations, multiplicity of analyses, results from similar studies, and other relevant evidence                                   | 16-18    |
| Generalisability         | 21  | Discuss the generalisability (external validity) of the study results                                                                                                                                        | 18       |
| <b>Other information</b> |     |                                                                                                                                                                                                              |          |
| Funding                  | 22  | Give the source of funding and the role of the funders for the present study and, if applicable, for the original study on which the present article is based                                                | 19       |

\*Give information separately for cases and controls in case-control studies and, if applicable, for exposed and unexposed groups in cohort and cross-sectional studies.

**Note:** An Explanation and Elaboration article discusses each checklist item and gives methodological background and published examples of transparent reporting. The STROBE checklist is best used in conjunction with this article (freely available on the Web sites of PLoS Medicine at <http://www.plosmedicine.org/>, Annals of Internal Medicine at <http://www.annals.org/>, and Epidemiology at <http://www.epidem.com/>). Information on the STROBE Initiative is available at [www.strobe-statement.org](http://www.strobe-statement.org).
